# Supplementary material for: Physician-reported barriers to using evidence-based antibiotic prescription guidelines in primary care: protocol for a systematic review and synthesis of qualitative studies using the Theoretical Domains Framework
Source: HighWire-hosted journal article supplement (doi:10.1136/bmjopen-2022-066681), 2022-11-01
Supplement: bmjopen-2022-066681supp009_data_supplement.pdf [file bmjopen-2022-066681supp009_data_supplement.pdf]

Appendix 9: Data extraction table samples

Table 1. Descriptive Characteristics of Included Studies

| Study, Year | Country | Setting | Sample Size | Research Aim | Data Collection Method |
|-------------|---------|---------|-------------|--------------|------------------------|
|             |         |         |             |              |                        |
|             |         |         |             |              |                        |
|             |         |         |             |              |                        |
|             |         |         |             |              |                        |
|             |         |         |             |              |                        |
|             |         |         |             |              |                        |
|             |         |         |             |              |                        |

Table 2. Summary of findings regarding physician-reported barriers to following antibiotic prescription guidelines

| TDF Domain | TDF sub-domain | Specific theme from the study | Studies (participants) | Confidence in the evidence | Explanation |
|------------|----------------|-------------------------------|------------------------|----------------------------|-------------|
|            |                |                               |                        |                            |             |
|            |                |                               |                        |                            |             |
|            |                |                               |                        |                            |             |
|            |                |                               |                        |                            |             |
|            |                |                               |                        |                            |             |
|            |                |                               |                        |                            |             |
|            |                |                               |                        |                            |             |
