# Supplementary material for: Physician-reported barriers to using evidence-based antibiotic prescription guidelines in primary care: protocol for a systematic review and synthesis of qualitative studies using the Theoretical Domains Framework
Source: HighWire-hosted journal article supplement (doi:10.1136/bmjopen-2022-066681), 2022-11-01
Supplement: bmjopen-2022-066681supp010_data_supplement.pdf [file bmjopen-2022-066681supp010_data_supplement.pdf]

**Appendix 10: Criteria used for assessing confidence in the evidence supporting the review findings using the CERQual approach**

| Component                  | Definition                                                                                                    | Threats to Component                                                                                                                                                                                                                                                                                                                                                                                                                                                                                                                                                                                                                | Do not Downgrade Confidence Level                                             |                                                                               | Downgrade Confidence Level                                                      |                                                                               |
|----------------------------|---------------------------------------------------------------------------------------------------------------|-------------------------------------------------------------------------------------------------------------------------------------------------------------------------------------------------------------------------------------------------------------------------------------------------------------------------------------------------------------------------------------------------------------------------------------------------------------------------------------------------------------------------------------------------------------------------------------------------------------------------------------|-------------------------------------------------------------------------------|-------------------------------------------------------------------------------|---------------------------------------------------------------------------------|-------------------------------------------------------------------------------|
|                            |                                                                                                               |                                                                                                                                                                                                                                                                                                                                                                                                                                                                                                                                                                                                                                     | No or very little concerns                                                    | Minor Concerns                                                                | Moderate Concerns                                                               | Serious Concerns                                                              |
| Methodological limitations | Are there any methodological weaknesses within individual studies that impact our confidence in the findings? | <p>CERQual suggests assessing issues of recruitment, data collection and analysis; but leaves the criteria selection to review authors.</p> <p>As previously defined by Hall et al., 2019, we will follow identified 4 areas to assess:</p> <ul style="list-style-type: none"> <li>- recruitment methods</li> <li>- data collection methods</li> <li>- assessor influence</li> <li>- data analysis methods</li> </ul> <p>Based on these criteria each individual study's methodological rigour was determined to be: low, moderate or good.</p> <p>Threats were considered to be present if the study was assessed to be of low</p> | None of the supporting data comes from studies with low methodological rigour | <25% of the supporting data comes from studies with low methodological rigour | 25-50% of the supporting data comes from studies with low methodological rigour | >50% of the supporting data comes from studies with low methodological rigour |

|           |                                                                                                                                                                                     |                                                                                                                                                                                                                                                                                                                                                                                                                                                                                            |                                                             |                                                                                                                                         |                                                                                                               |                                                                                                             |
|-----------|-------------------------------------------------------------------------------------------------------------------------------------------------------------------------------------|--------------------------------------------------------------------------------------------------------------------------------------------------------------------------------------------------------------------------------------------------------------------------------------------------------------------------------------------------------------------------------------------------------------------------------------------------------------------------------------------|-------------------------------------------------------------|-----------------------------------------------------------------------------------------------------------------------------------------|---------------------------------------------------------------------------------------------------------------|-------------------------------------------------------------------------------------------------------------|
|           |                                                                                                                                                                                     | methodological rigour.                                                                                                                                                                                                                                                                                                                                                                                                                                                                     |                                                             |                                                                                                                                         |                                                                                                               |                                                                                                             |
| Coherence | How clear and cogent the fit is between the data from the primary studies and a review finding that synthesizes that data?<br><br>By 'cogent', we mean well supported or compelling | <ul style="list-style-type: none"> <li>- Contradictory data</li> <li>- Ambiguous or incomplete data</li> <li>- Competing theories</li> </ul>                                                                                                                                                                                                                                                                                                                                               | No threats present in the supporting data                   | Threats present in <25% of the supporting data                                                                                          | Threats present in 25-50% of the supporting data                                                              | Threats present in >50% of the supporting data                                                              |
| Adequacy  | The degree of richness as well as the quantity of data supporting the review finding.                                                                                               | <ul style="list-style-type: none"> <li>- <i>Data richness - descriptive findings:</i> superficial data is ok,</li> <li>- <i>Data richness - explanatory findings:</i> superficial data may lack sufficient quality to fully explore the phenomenon</li> <li>- <i>Data quantity:</i> one or very few studies or small studies may cause concern. This, however, should be taken into context of the review aim and question. If the finding is about a broad phenomenon or large</li> </ul> | The supporting data is of sufficient richness and quantity. | The data comes from multiple studies in different settings and varying sample sizes and <25% of the supporting data is too superficial. | The data comes from only a few studies or small studies and 25-50% of the supporting data is too superficial. | The data comes from only a few studies or small studies and >50% of the supporting data is too superficial. |

|                                                                                                                                                                                                                                                          |                                                                                                                              |                                                                                                                                                                                                                                                                                                                                                                                                                                                                                                                                                                                              |                                                                    |                                                                                   |                                                                                    |                                                                                          |
|----------------------------------------------------------------------------------------------------------------------------------------------------------------------------------------------------------------------------------------------------------|------------------------------------------------------------------------------------------------------------------------------|----------------------------------------------------------------------------------------------------------------------------------------------------------------------------------------------------------------------------------------------------------------------------------------------------------------------------------------------------------------------------------------------------------------------------------------------------------------------------------------------------------------------------------------------------------------------------------------------|--------------------------------------------------------------------|-----------------------------------------------------------------------------------|------------------------------------------------------------------------------------|------------------------------------------------------------------------------------------|
|                                                                                                                                                                                                                                                          |                                                                                                                              | variety of people have less confidence if it is based on small studies.                                                                                                                                                                                                                                                                                                                                                                                                                                                                                                                      |                                                                    |                                                                                   |                                                                                    |                                                                                          |
| Relevance                                                                                                                                                                                                                                                | The extent to which the body of data from the primary studies is applicable to the context specified in the review question. | <p>Relevance will be assessed in terms of the following elements of our review question:</p> <p><i>Population:</i><br/>Any URTI outlined in the Choosing Wisely Canada Guidelines:</p> <ul style="list-style-type: none"> <li>- Otitis Media</li> <li>- Pharyngitis</li> <li>- Sinusitis</li> <li>- The common cold</li> <li>- Bronchitis</li> </ul> <p><i>Phenomenon of interest:</i><br/>Family physicians' perspectives and experiences regarding evidence based antibiotic prescribing practices for URTIs.</p> <p><i>Context:</i><br/>Patients with URTIs in primary care settings.</p> | The supporting data is of direct relevance to the review question. | Some of the supporting data (< 25%) is of indirect, partial or unclear relevance. | Some of the supporting data (25-50%) is of indirect, partial or unclear relevance. | The majority of the supporting data (>50%) is of indirect, partial or unclear relevance. |
| <p>Note: Single study rule: for themes with data from a single study only, the following criteria was used to judge methodological limitation: If the study has moderate or low moderate methodological rigour, the confidence level was downgraded.</p> |                                                                                                                              |                                                                                                                                                                                                                                                                                                                                                                                                                                                                                                                                                                                              |                                                                    |                                                                                   |                                                                                    |                                                                                          |

\* Reproduced from: Hall AM, Scurry SR, Pike AE, Albury C, Richmond HL, Matthews J, et al. Physician-reported barriers to using evidence-based recommendations for low back pain in clinical practice: a systematic review and synthesis of qualitative studies using the Theoretical Domains Framework. *Implement Sci.* 2019;14:49.
